# Supplementary material for: Prime and Boost Vaccination Elicit a Distinct Innate Myeloid Cell Immune Response
Source: PubMed Central journal article supplement (PMC5814452; doi:10.1038/s41598-018-21222-2), 2018-02-15
Supplement: 41598_2018_21222_MOESM1_ESM.pdf [file 41598_2018_21222_MOESM1_ESM.pdf]

## **Prime and Boost Vaccination Elicit a Distinct Innate Myeloid Cell Immune Response**

Jean-Louis Palgen<sup>1,2</sup>, Nicolas Tchitchek<sup>1,2</sup>, Jamila Elh mouzi-Younes<sup>1,2</sup>, Simon Delandre<sup>1,2</sup>, Inana Namet<sup>1,2</sup>, Pierre Rosenbaum<sup>1,2</sup>, Nathalie Dereuddre-Bosquet<sup>1,2</sup>, Frédéric Martinon<sup>1,2</sup>, Antonio Cosma<sup>1,2</sup>, Yves Levy<sup>2,3</sup>, Roger Le Grand<sup>1,2</sup>, Anne-Sophie Beignon<sup>1,2,\*</sup>

<sup>1</sup> CEA – Université Paris Sud 11 – INSERM U1184, Immunology of Viral Infections and Autoimmune Diseases, IDMIT department, IBFJ, 92265 Fontenay-aux-Roses, France

<sup>2</sup> Vaccine Research Institute, Henri Mondor Hospital, 94010 Créteil, France

<sup>3</sup> Institut Mondor de Recherche Biomédicale – INSERM U955, équipe 16 physiopathologie et immunothérapies dans l'infection VIH, 94010, Créteil, France

**Supplementary Information**

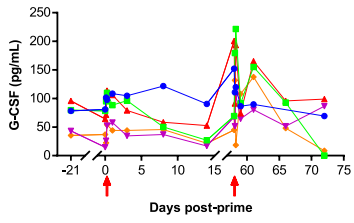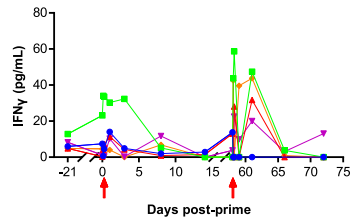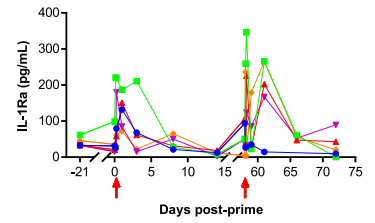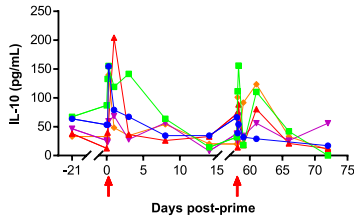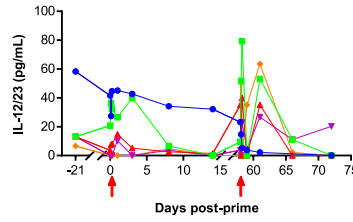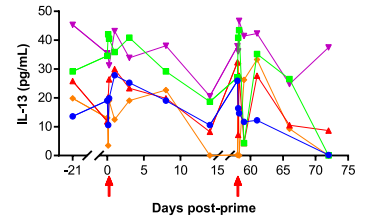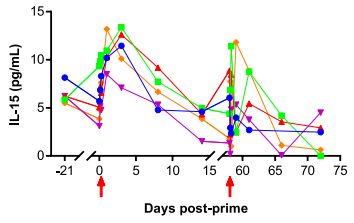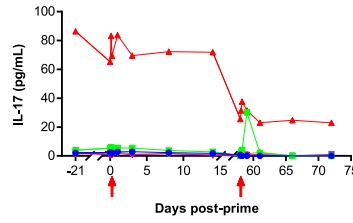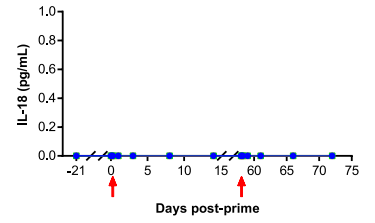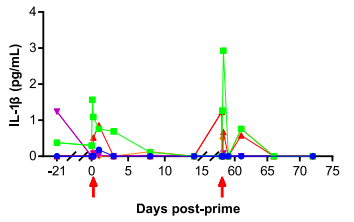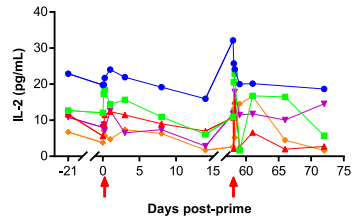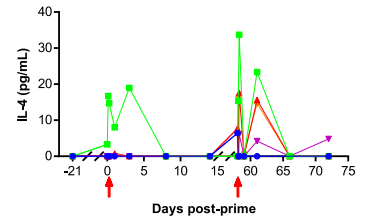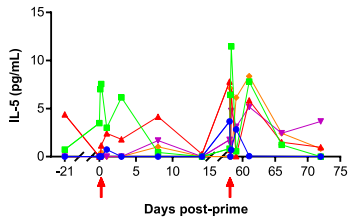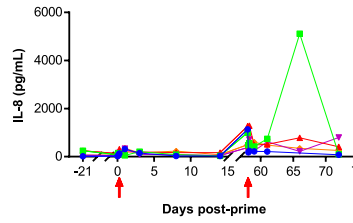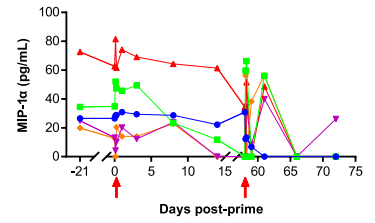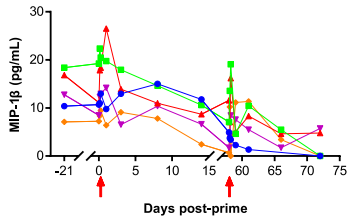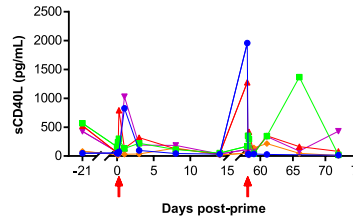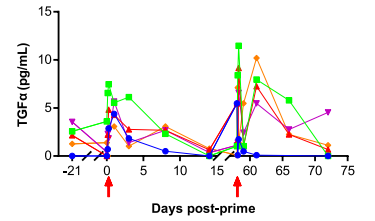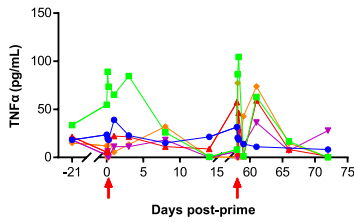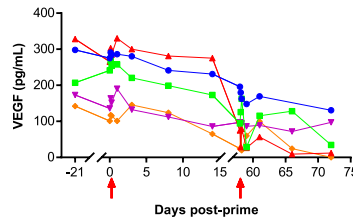

animals

- BB078
  - BB231
  - BC641
  - BD619
  - BD620
- ↑ MVA injection

**Figure S1 – Kinetics of cytokine, chemokine, and growth factor concentrations not affected by vaccination.** The blood levels of G-CSF, IFN $\gamma$ , IL-1 $\beta$ , IL-1R $\alpha$ , IL-10, IL-12 $_{23}$ , IL-13, IL-15, IL-17, IL-18, IL-2, IL-4, IL-5, IL-8, MIP-1 $\alpha$ , MIP-1 $\beta$ , sCD40L, TGF $\alpha$ , TNF $\alpha$ , and VEGF are displayed. These cytokine levels were all assessed by Luminex. Cytokine concentrations below the limit of detection were set to 0. The concentrations had to be significantly different ( $p \leq 0.01$ ) from the baseline level (HOPP) at two timepoints, at least, to be considered affected by vaccination. However, IL-8 was not considered to be affected because of the significant difference in the concentrations between HOPP and HOPB, which was likely related to the Luminex assays performed independently for the PP and PB samples.

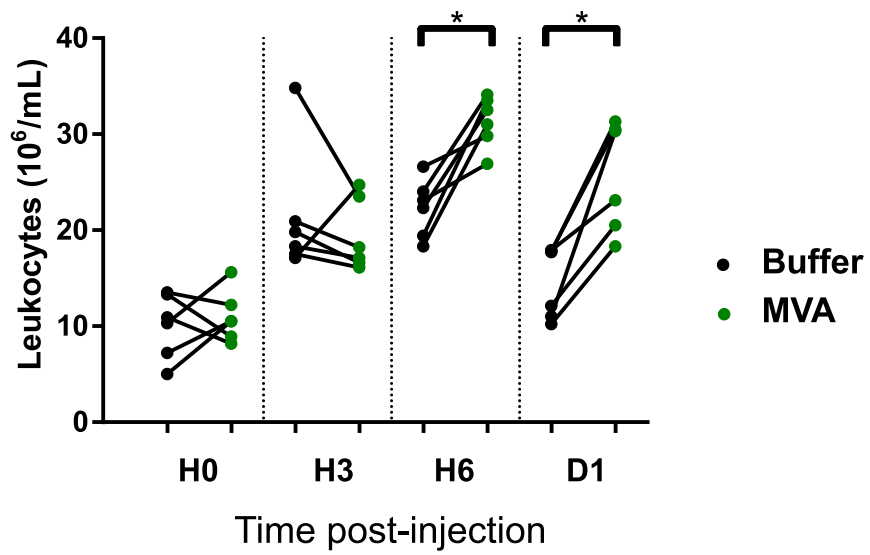

**Figure S2. Impact of vaccine vs buffer subcutaneous injection.** Six cynomolgus macaques were injected subcutaneously either with MVA HIV B or buffer only. Individual CBC are indicated. P-values were considered to be significant when  $p < 0.05$  using Wilcoxon test.

Figure available

-as pdf on FlowRepository database at:

<https://flowrepository.org/id/RvFrm6T8FFIAXwRj85r3b8BMTHortPjRbJcbRyAzZgX63eQNcaDw2Tj8K8vM0694>

-as interactive figure on IDMIT data dissemination platform at :

<http://data.idmitcenter.fr/MVA-innate-myeloid/?page=qc>

**Figure S3 – Phenotype of each cell cluster.** The distribution of all markers is displayed as histograms for each of the 600 clusters. The green color indicates that the distribution of the marker is unimodal and narrow (defined by a p-value below 0.05 for the unimodality test using Hartigan's dip test and an IQR below 2) and the red color indicates that at least one of the two conditions was not fulfilled. SPADE clustering markers are indicated in blue. The total number of cells per cluster, regardless of sample origin, is indicated between the parenthesis.

CD66

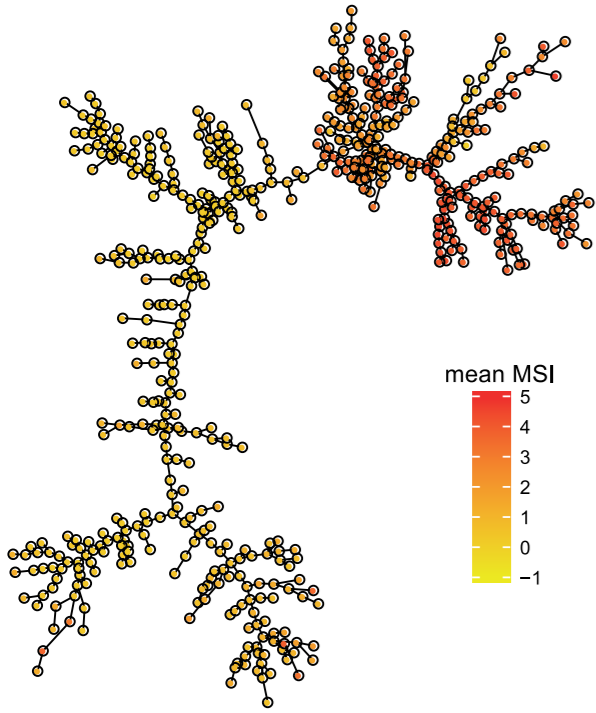

CD3

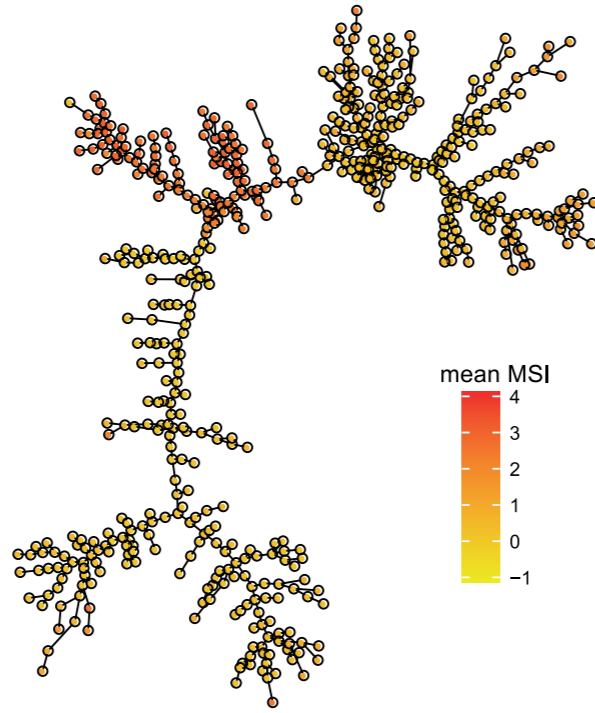

HLA-DR

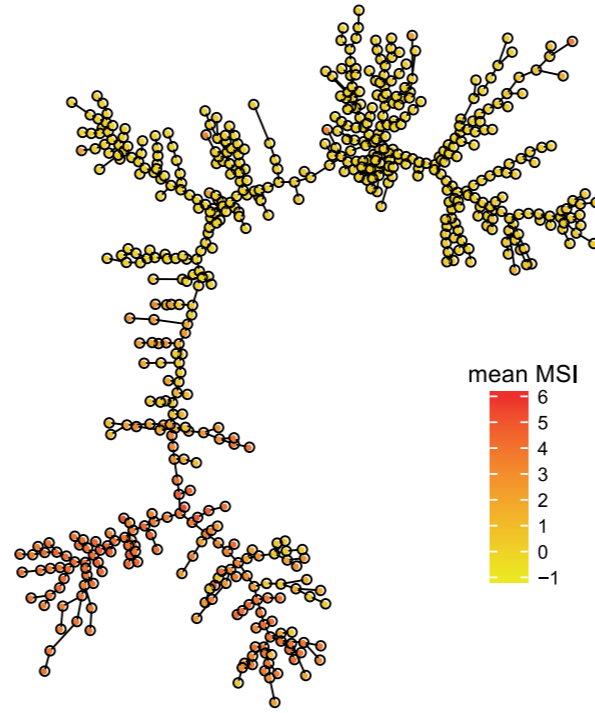

CD8

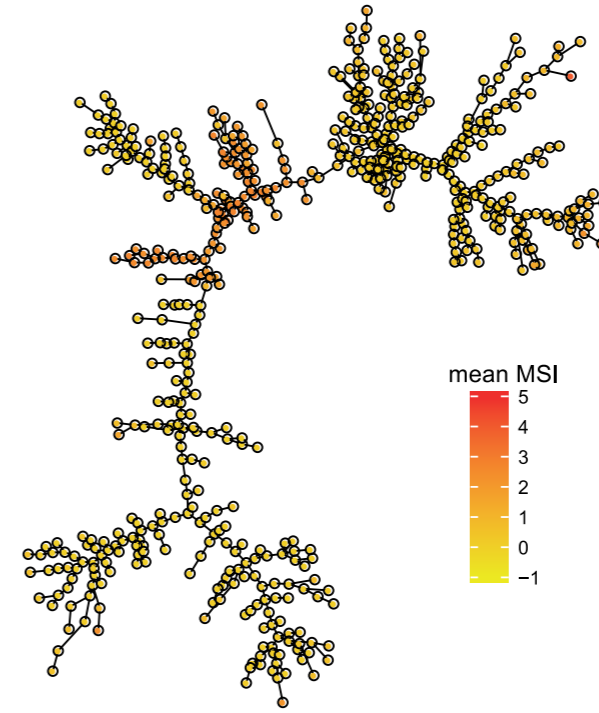

CD4

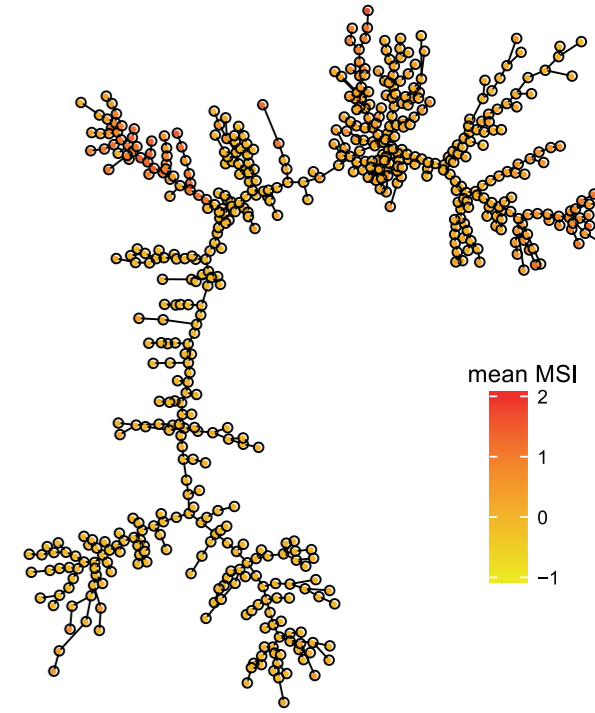

CD123

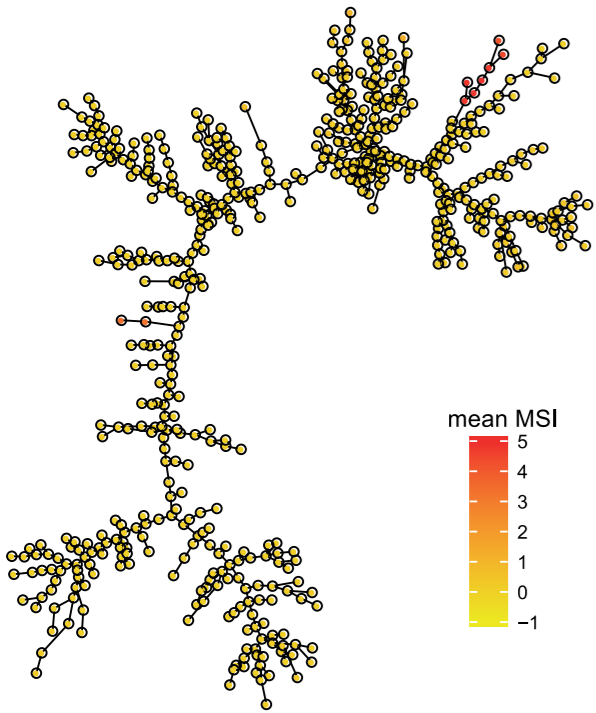

CD11c

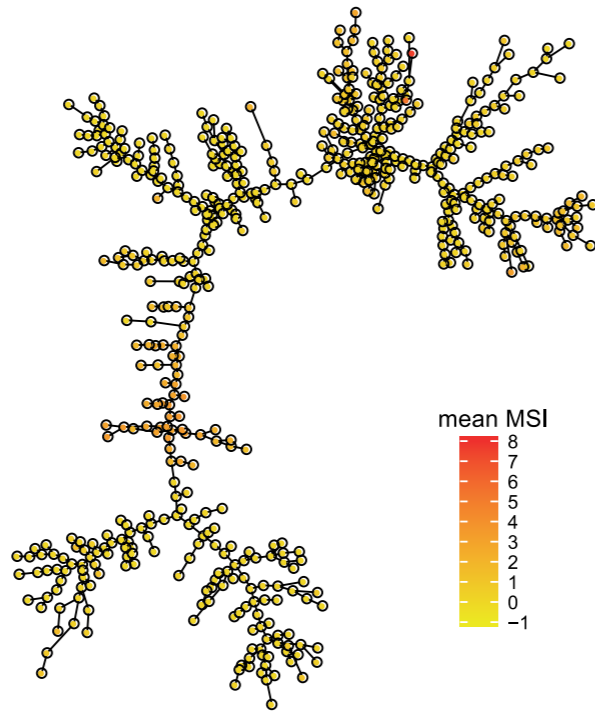

CD16

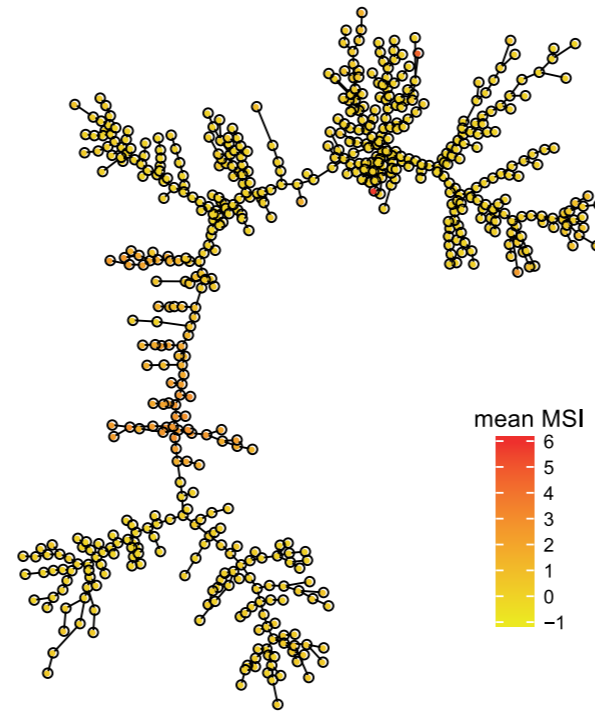

CD14

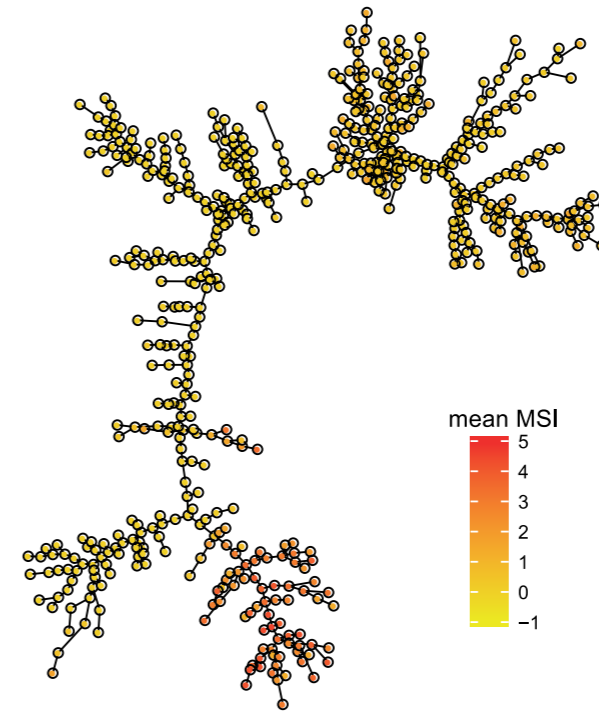

CD20

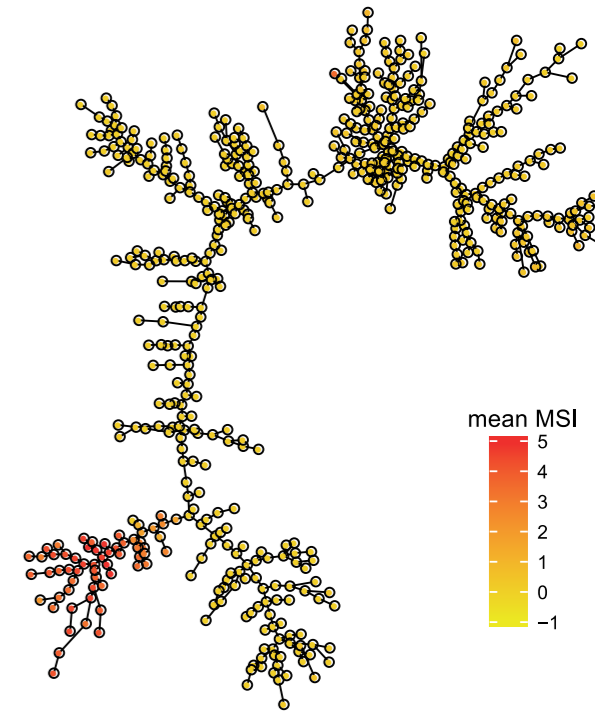

**Figure S4 – Annotation of the SPADE tree.** Each node of the SPADE tree is colored by the median expression of the indicated marker among all cells from the entire dataset. The size of the node is not proportional to the number of cells it contains. The scale is different for each marker.

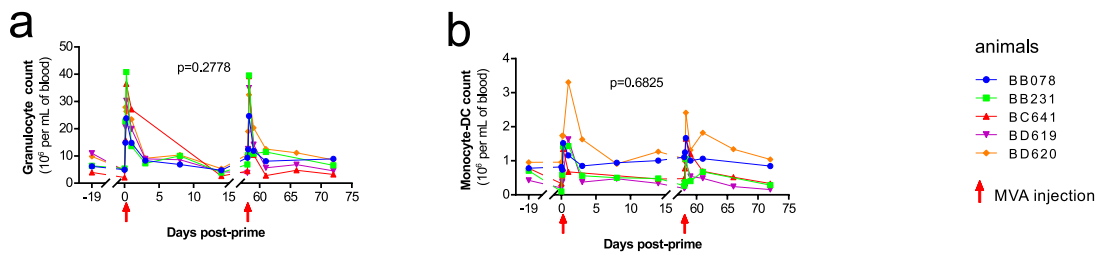

**Figure S5 – Granulocytes and Monocyte-DC abundance profiles.** The absolute blood counts of (a) granulocytes and (b) monocytes-DCs were quantified after MVA immunizations using CBC and mass cytometry data. Granulocytes and monocytes-DCs were defined as in **Figure 3c**. Granulocytes comprised neutrophils and basophils. Monocytes-DCs comprised monocytes, cDCs, pDCs, inflammatory cDCs/non-classical monocytes, and uncharacterized APCs. Individual abundance profiles are represented. Individual AUC after the prime (H3-D14PP) and boost (H3-D14PB) were calculated and compared using a permutation test. The mean PP and PB AUC, and p-values are indicated. P values were considered to be significant when  $p \leq 0.01$ . The red arrows indicate the timepoints of vaccination.



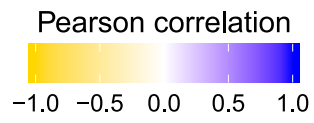

**a**  
Granulocytes

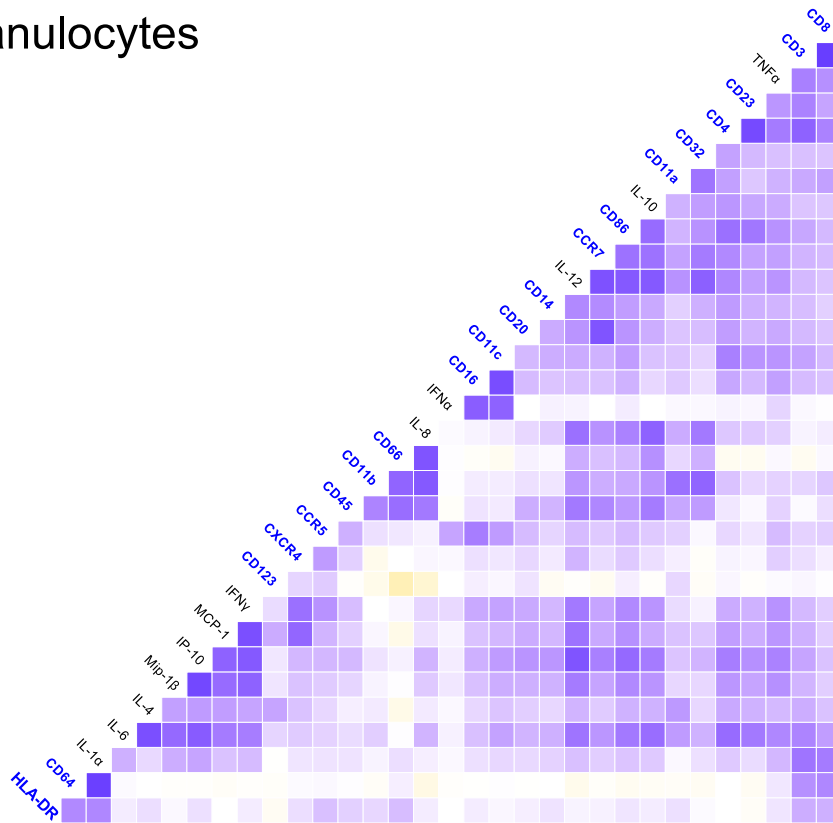

**b**  
Monocytes-DCs

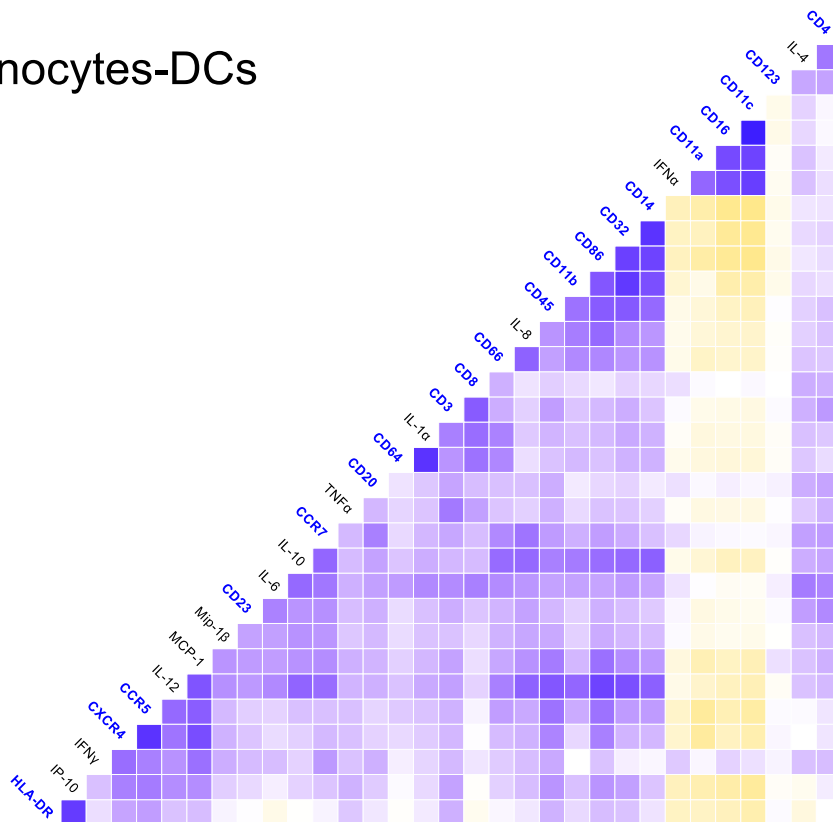

**Figure S6 – Correlations between marker expression.** The Pearson coefficients of correlations between the expression of every marker are displayed for (a) granulocytes and (b) monocytes-DCs. Clustering markers are indicated in blue. Correlations were considered to be significant when  $|R| \geq 0.75$ .

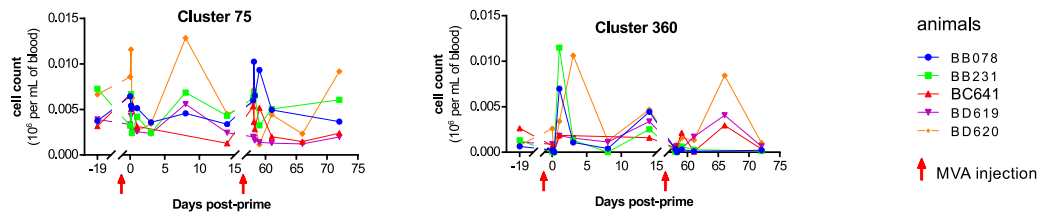

**Figure S7 – Abundance profiles of the two pDC clusters.** The individual number of cells/ $\mu$ L of blood for each pDC cluster is shown over time.

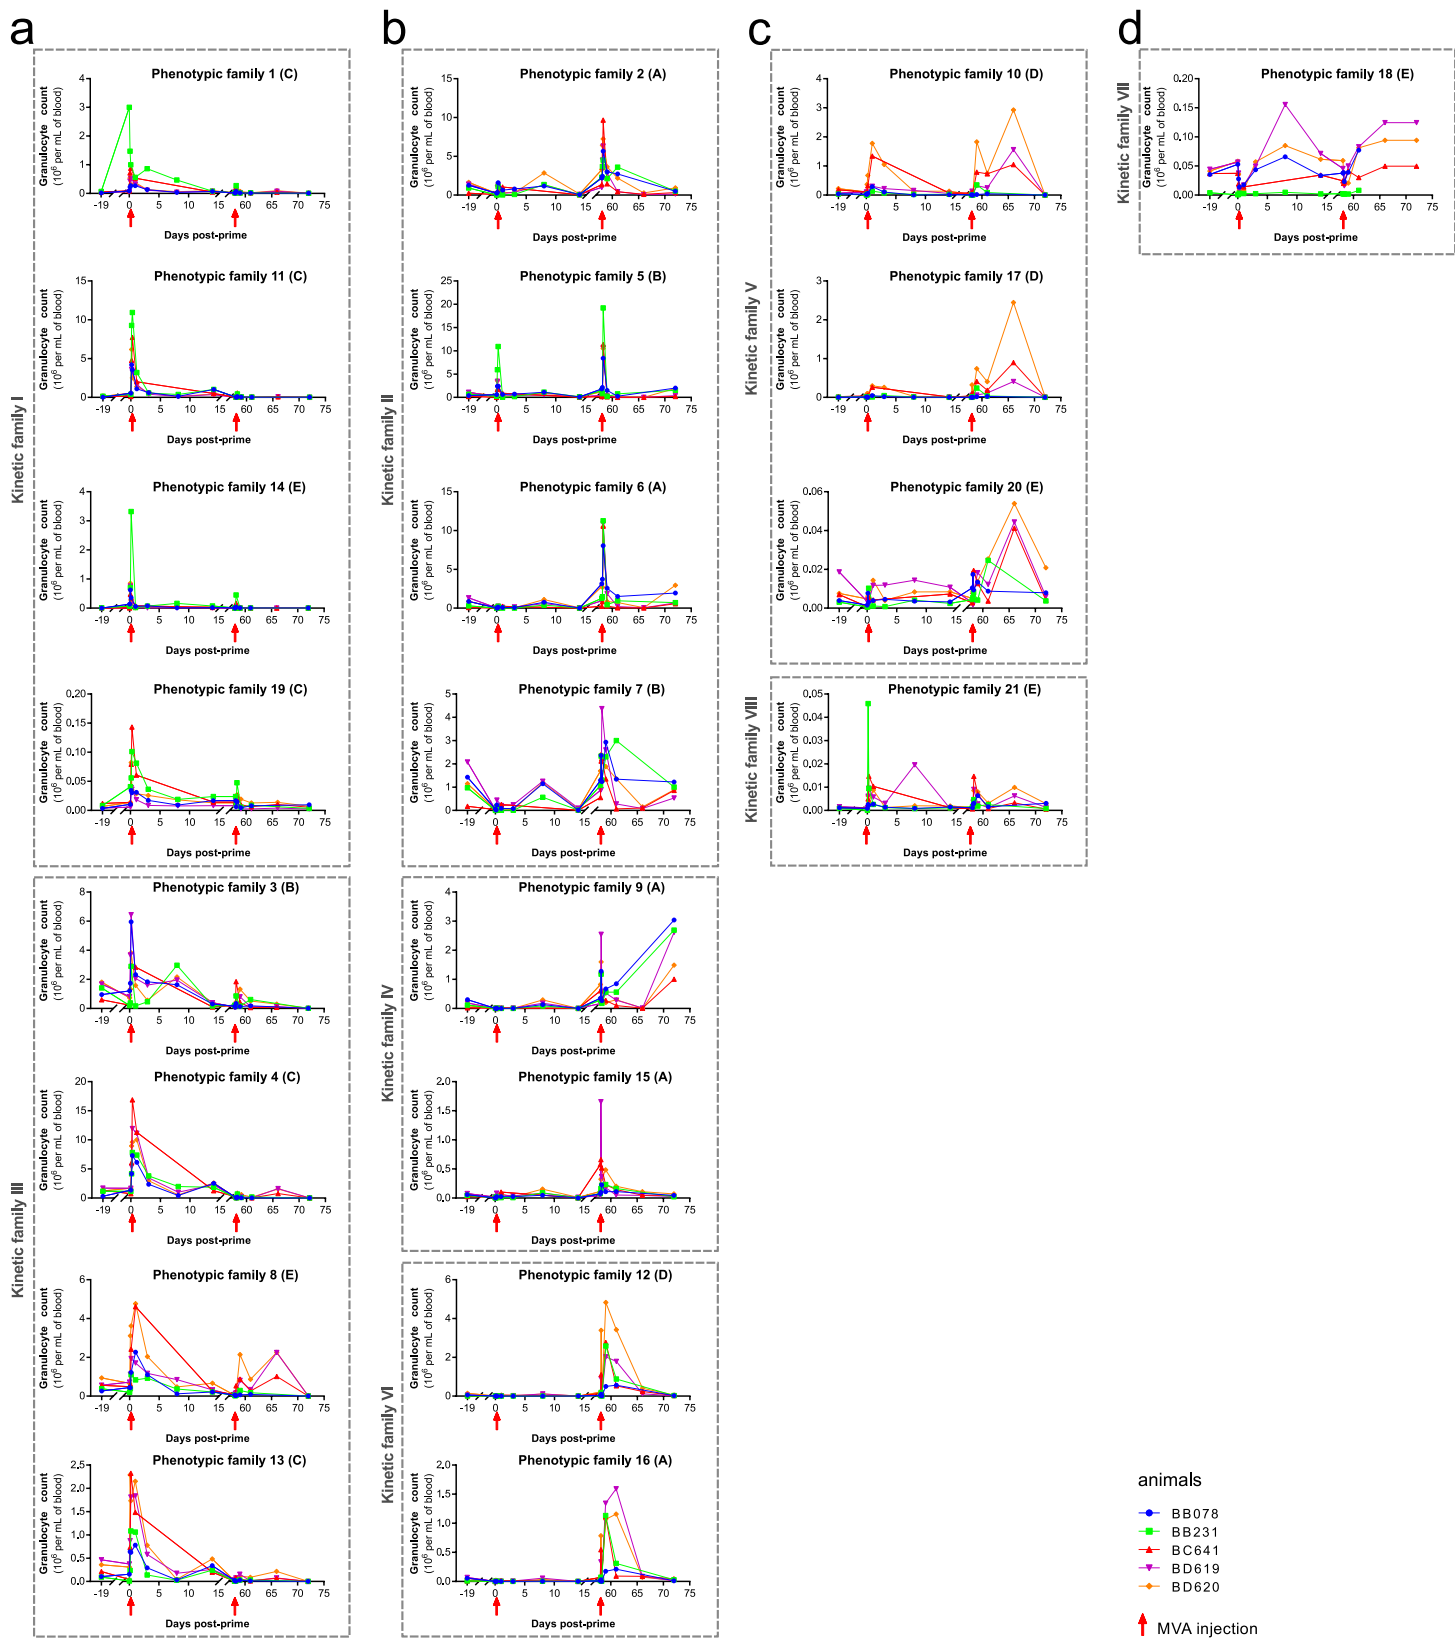

**Figure S8 – Abundance profiles of the 21 granulocyte phenotypic families.** The individual number of cells/ $\mu\text{L}$  of blood for each granulocyte phenotypic family is shown over time, the superfamily is indicated in parentheses. Phenotypic families were separated based on their abundance profiles: **(a)** post-prime enrichment, **(b)** post-boost enrichment, **(c)** both post-prime and post-boost enrichment, and **(d)** no or heterogeneous enrichment after each immunization. They were further grouped in dotted boxes depending on the kinetic family to which they belong, as defined in **Table 1**.

a

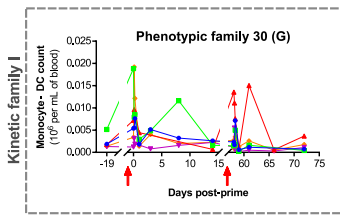

b

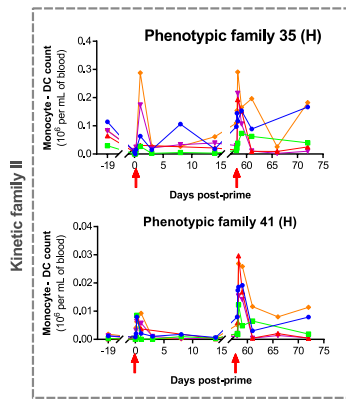

c

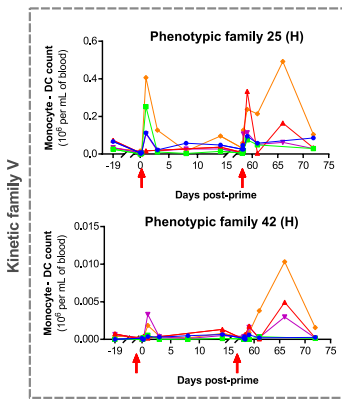

d

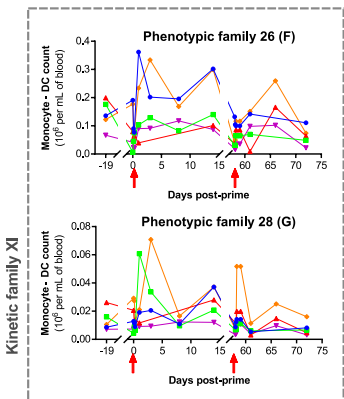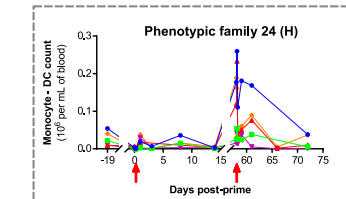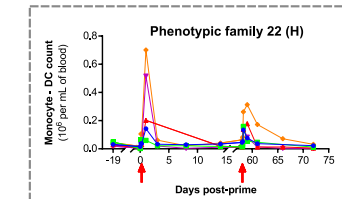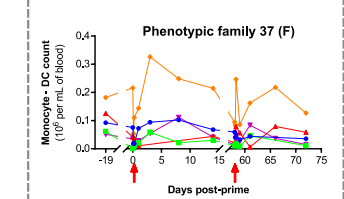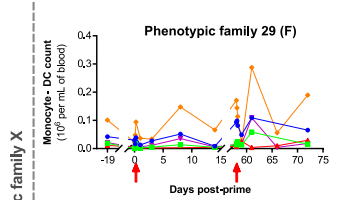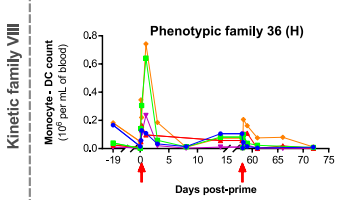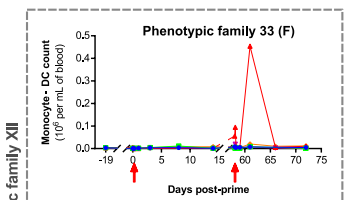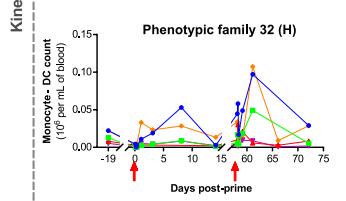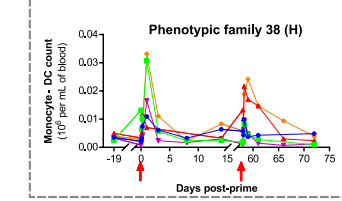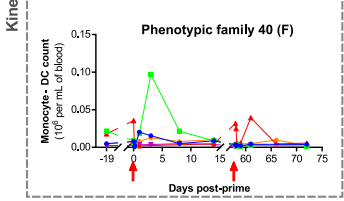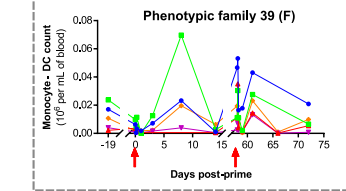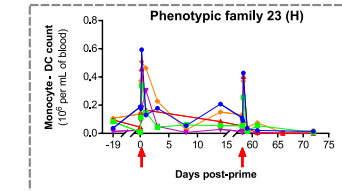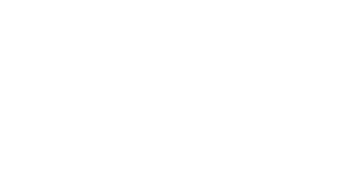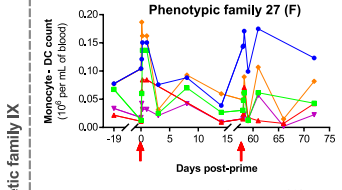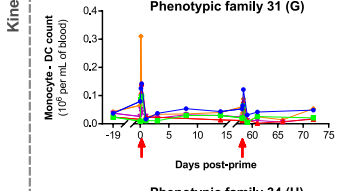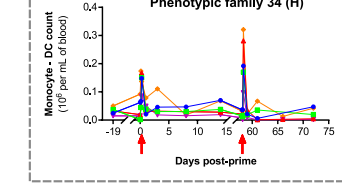

animals

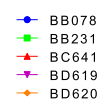

↑ MVA injection

**Figure S9 – Abundance profiles of the 21 monocyte-DC phenotypic families.** The individual number of cells/ $\mu\text{L}$  of blood for each monocyte-DC phenotypic family is shown over time, the superfamily is indicated in parentheses. Phenotypic families were separated based on their abundance profiles: **(a)** post-prime enrichment, **(b)** post-boost enrichment, **(c)** both post-prime and post-boost enrichment, and **(d)** no or heterogeneous enrichment after each immunization. They were further grouped in dotted boxes depending on the kinetic family to which they belong, as defined in **Table 1**.

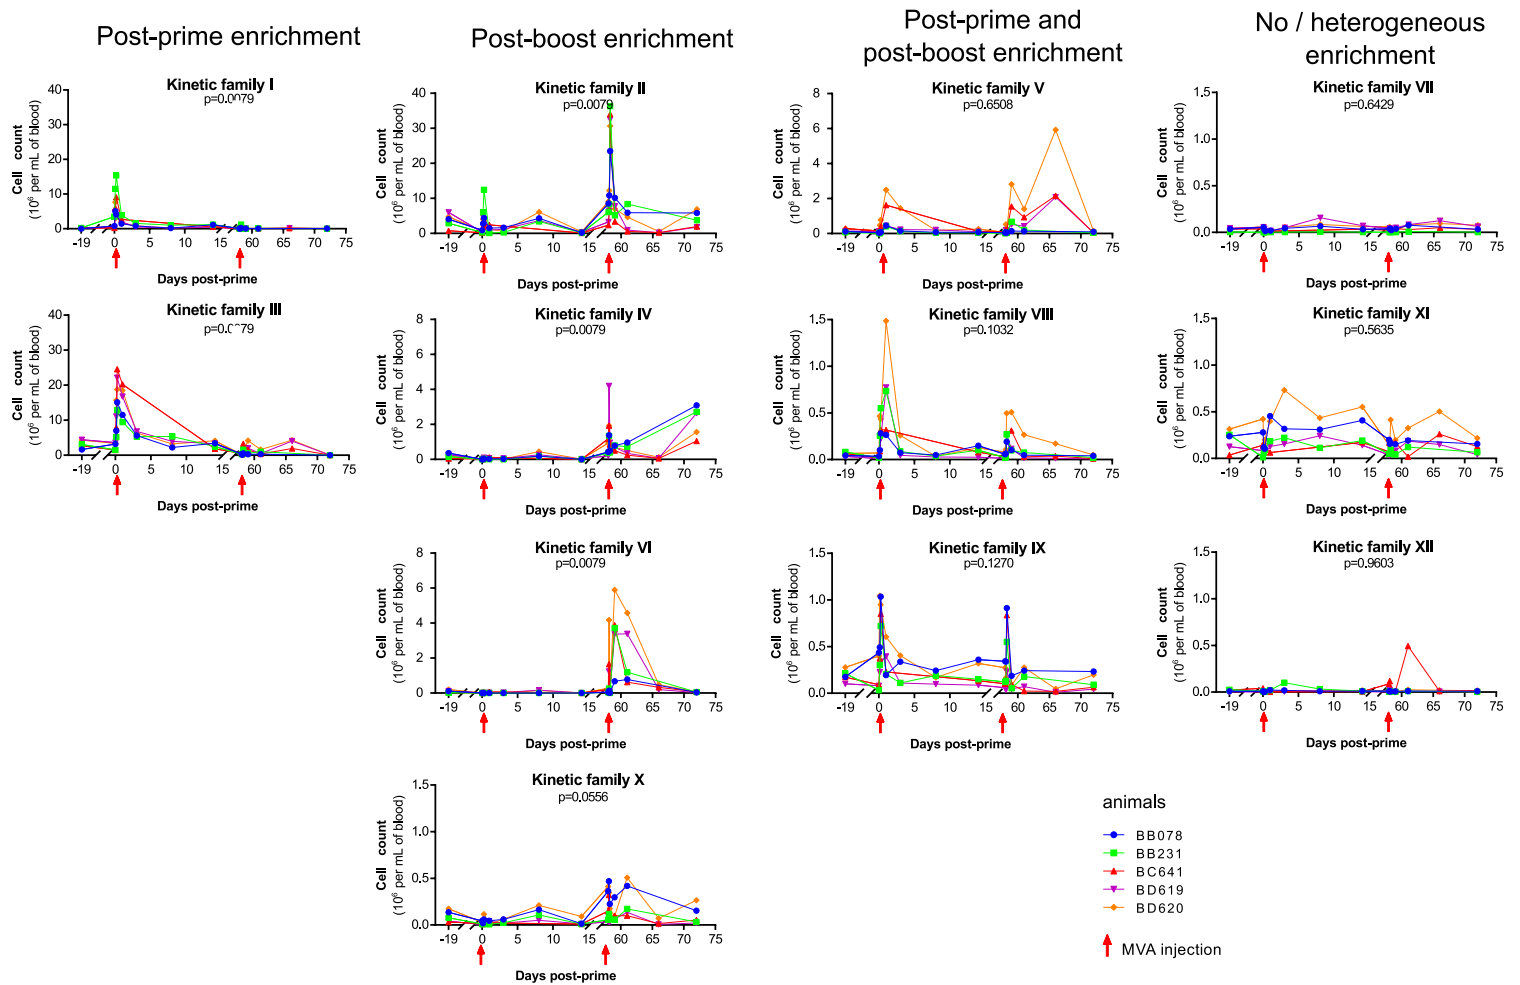

**Figure S10 – Abundance profiles of kinetic families.** The kinetics of the twelve kinetic families defined on **Figure 5a**, are given at the individual level. They are regrouped into kinetic patterns displaying enrichment essentially post-prime, essentially post-boost, both after the prime and boost, or no or heterogeneous enrichment after each immunization. As for **Figure 5a**, the individual AUC after the prime (H3-D14PP) and boost (H3-D14PB) were calculated for each kinetic family and compared using a permutation test. The p-values are indicated and considered to be significant when  $p \leq 0.01$ . Note that the scale of the Y-axis is specific to each kinetic family. The red arrows indicate the prime and boost injections.

**a**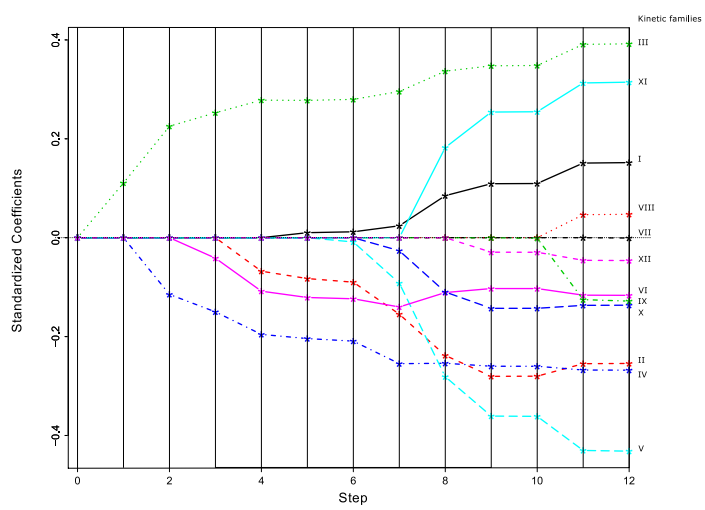**b**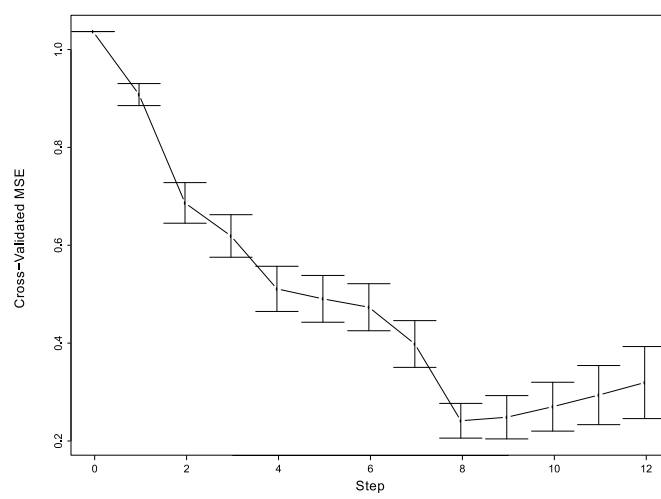

**Figure S11 – Selection of kinetic families for LDA classification using LASSO. (a)** The evolution of LDA-LASSO coefficients at each step for each kinetic family is represented. **(b)** The evolution of the mean standard error (MSE) at each step assessed by leave-one-out cross-validation is shown.



**a****Neutrophils**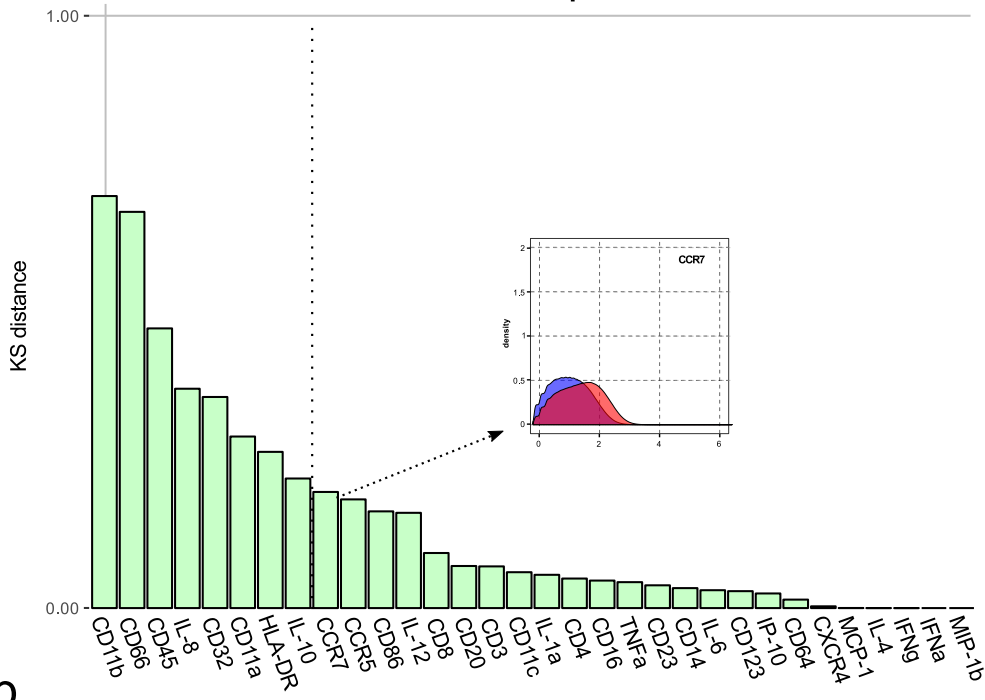**b****cDCs**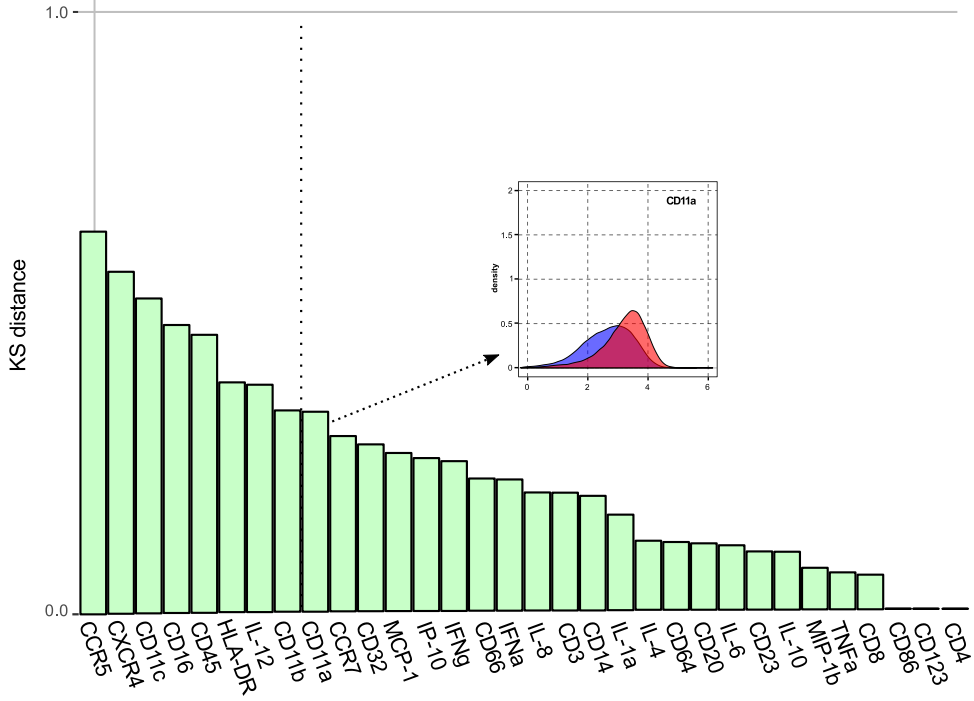**c****Monocytes**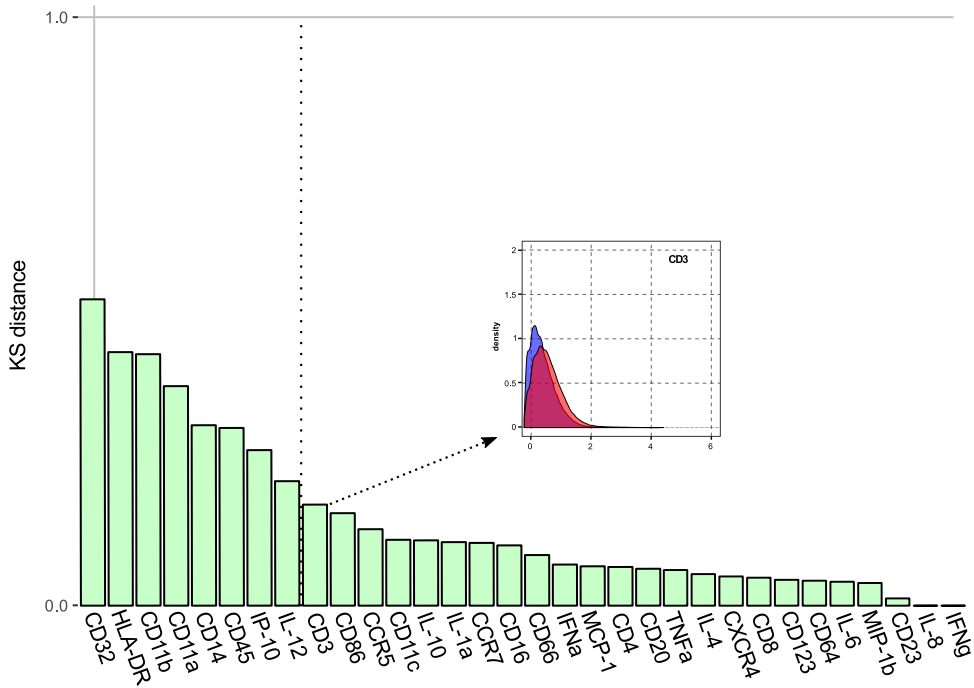

**Figure S12 – Comparison of marker distribution between cells that best discriminate between the post-prime and post-boost innate myeloid response.** The Kolmogorov-Smirnov distance was computed to compare each marker distribution between prime- and boost-enriched neutrophils (a), cDCs (b), and monocytes (c). The prime cell signature consisted of cells from kinetic families III, XI, and I, whereas the boost cell signature consisted of cells from kinetic families V, II, IV, X, VI, and I as defined in **Figure 7c** after LASSO/LDA. For each category (prime-enriched or boost-enriched), the histogram was plotted using all cells (all animals and all timepoints) belonging to the indicated kinetic families and the indicated cellular compartment. However, there were a few exceptions. Since only CD14<sup>low</sup> monocytes were found associated with the prime (**Table 1**), all monocytes that were not exclusively associated with the boost were used for the comparison of marker expression (*i.e.* monocytes from kinetic families V, VIII, IX, and not from kinetic families II, IV, VI and X). In addition, neither inflammatory cDCs/non-classical monocytes (monocyte-DC phenotypic family 11) nor uncharacterized APCs (monocyte phenotypic families 9 and 10) were included with the cDCs or monocytes. The dotted line indicates the top eight markers, with the highest KS distance, shown in **Figure 7**. The histogram for the ninth highest KS distance is indicated for each population.

**a**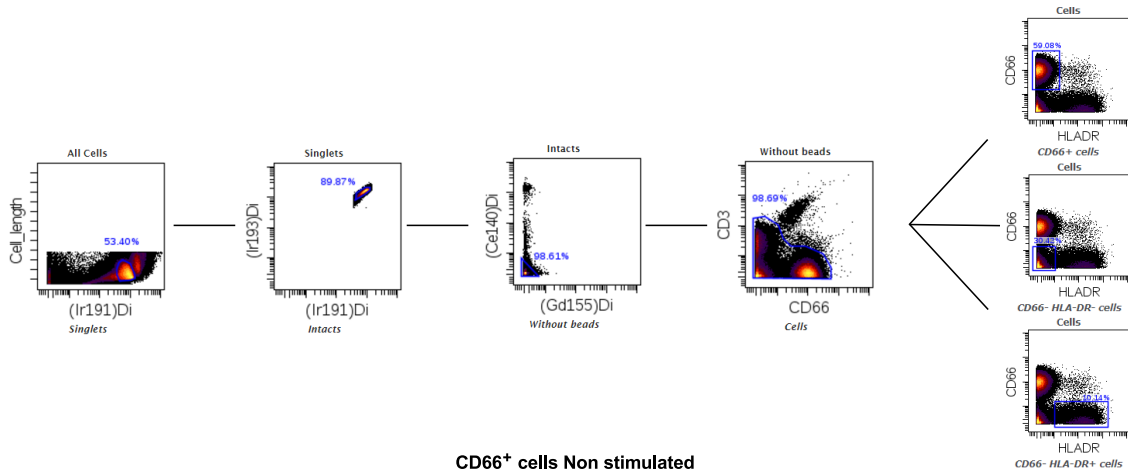**b**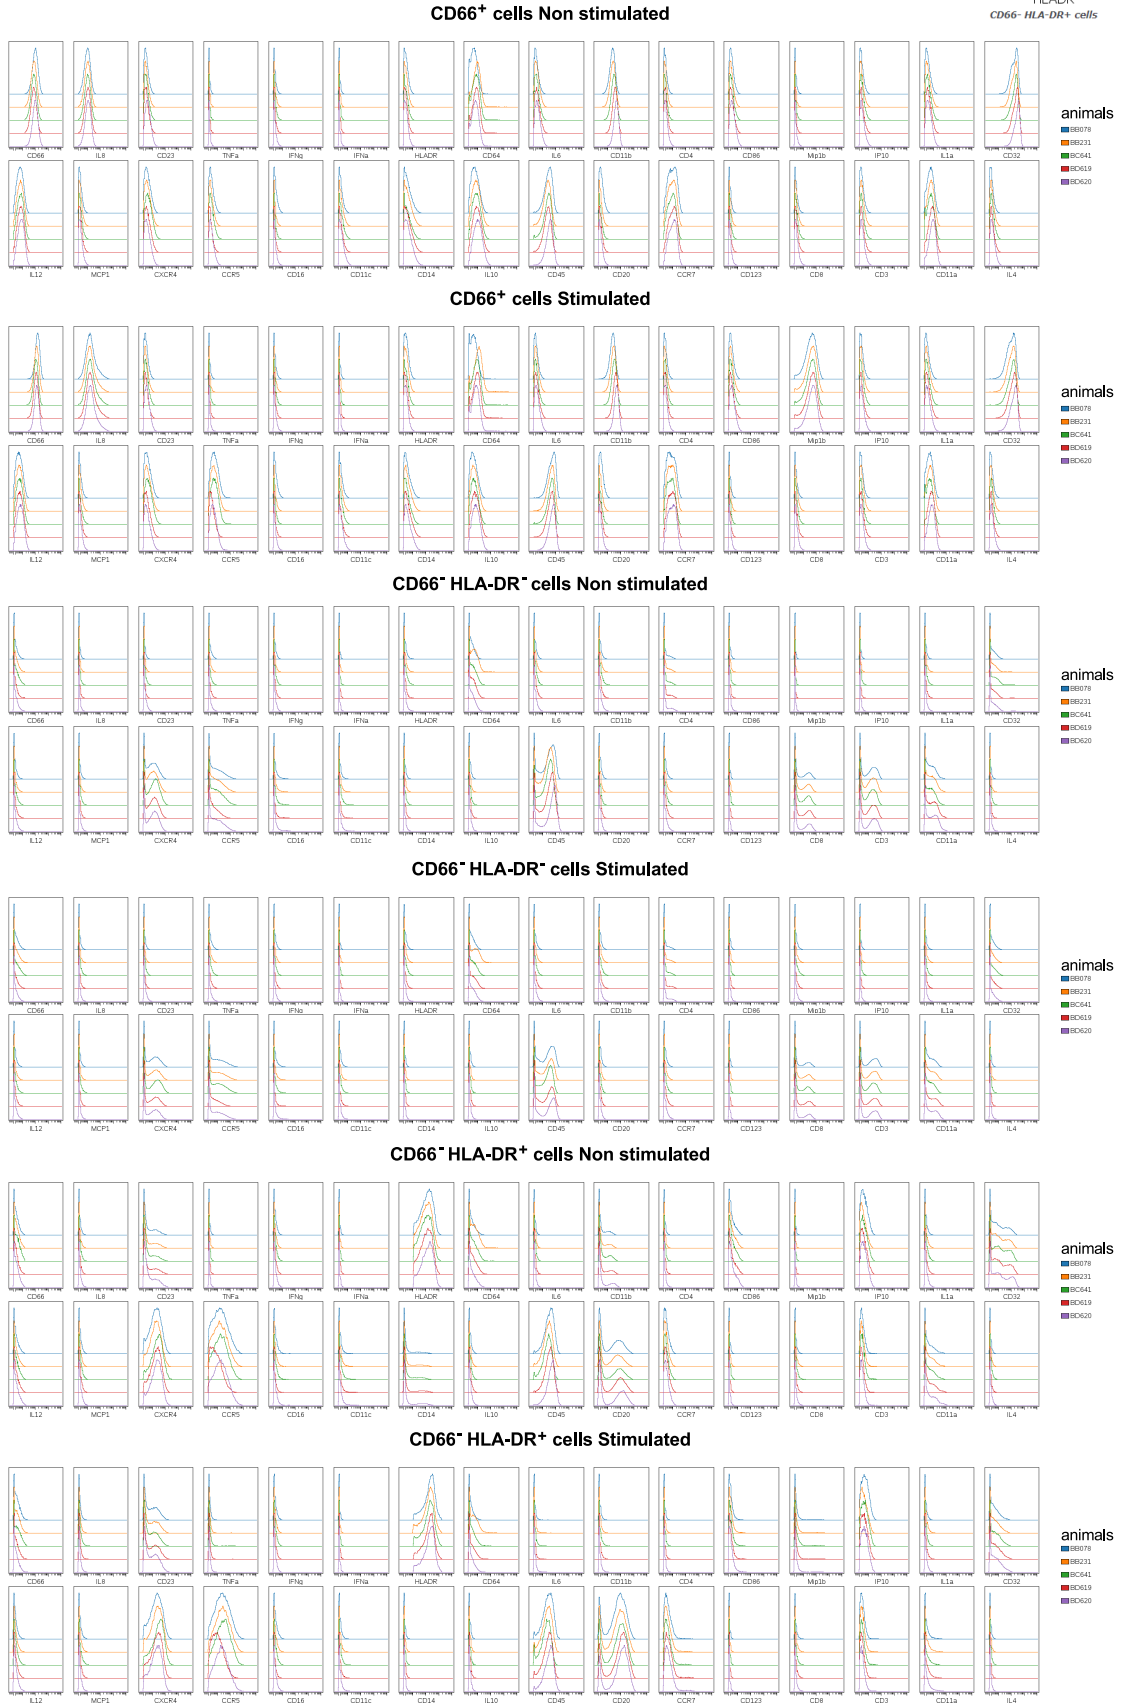

**Figure S13 – Staining and acquisition controls.** The same two control samples were stained and acquired simultaneously for each of the five stainings and acquisitions of samples from the five vaccinated animals. These control samples were obtained after *ex vivo* restimulation of whole blood from one unrelated macaque with or without a TLR ligand cocktail (TLR 3, 4, 7, and 8) composed of 1 µg/mL LPS (from *E. coli* 0111:B4, Invivogen), 100 µg/mL Poly I-C (Invivogen), and 10 µg/mL R848 (Mabtech). Whole blood was incubated with or without stimulation for 6 h, with the addition of 10 µg/mL BFA (Sigma) during the last 4 h. The cells were then fixed, red-blood cells lysed, and frozen as vaccinated animal samples. **(a)** Gating strategy to define the cell populations to compare staining profiles between control samples. The non stimulated control sample for the acquisition of macaque BB078 samples is shown. **(b)** Distribution of all markers across CD66<sup>+</sup>, CD66<sup>-</sup> HLA-DR<sup>-</sup>, and CD66<sup>-</sup> HLA-DR<sup>+</sup> cells. Each control samples acquisition is labelled with the ID of the macaque samples that were stained and acquired simultaneously.

|                           | Baseline vs H3PP | Baseline vs H6PP | Baseline vs D1PP | Baseline vs D3PP | Baseline vs D8PP | Baseline vs D14PP | Baseline vs HOPP | Baseline vs H3PB | Baseline vs H6PB | Baseline vs D1PB | Baseline vs D3PB | Baseline vs D8PB | Baseline vs D14PB | H3PP vs H3PB | H6PP vs H6PB | D1PP vs D1PB | D3PP vs D3PB | D8PP vs D8PB | D14PP vs D14PB |
|---------------------------|------------------|------------------|------------------|------------------|------------------|-------------------|------------------|------------------|------------------|------------------|------------------|------------------|-------------------|--------------|--------------|--------------|--------------|--------------|----------------|
| CRP                       | nd               | nd               | 0.0079           | 0.0159           | nd               | nd                | nd               | nd               | nd               | 0.0079           | nd               | nd               | nd                | nd           | nd           | 0.0476       | 0.2778       | nd           | nd             |
| G-CSF                     | 0.7698           | 0.1508           | 0.1746           | 0.4841           | 0.8333           | 0.5238            | 0.1905           | 0.0635           | 0.1111           | 0.1190           | 0.0238           | 0.2778           | 1.0000            | 0.1270       | 0.3889       | 0.9048       | 0.0635       | 0.6190       | 0.6746         |
| IFN $\gamma$              | 1.0000           | 0.8254           | 0.3413           | 0.8254           | 0.8492           | 0.1270            | 0.9286           | 0.4444           | 0.3571           | 0.8810           | 0.0952           | 0.2778           | 0.4841            | 0.4444       | 0.4048       | 0.5635       | 0.1270       | 0.1905       | 1.0000         |
| IL-10                     | 0.7222           | 0.0635           | 0.0952           | 0.6032           | 0.7698           | 0.2460            | 0.9127           | 0.6111           | 0.2302           | 0.9127           | 0.1905           | 0.6349           | 0.2063            | 1.0000       | 0.3730       | 0.0635       | 0.6032       | 0.1429       | 0.8571         |
| IL-12 <sub>23</sub> (p40) | 0.9206           | 0.7937           | 0.6746           | 0.9365           | 0.8651           | 0.5635            | 1.0000           | 0.5079           | 0.3730           | 0.6984           | 0.1905           | 0.5476           | 0.4048            | 0.5079       | 0.5635       | 0.3889       | 0.2937       | 0.8651       | 1.0000         |
| IL-13                     | 1.0000           | 0.5159           | 0.3889           | 0.3889           | 0.6190           | 0.1667            | 0.8095           | 0.6984           | 0.8571           | 0.7222           | 0.3889           | 0.4762           | 0.1984            | 0.7778       | 0.8968       | 0.2857       | 0.8492       | 0.2143       | 0.9206         |
| IL-15                     | 0.4048           | 0.2143           | 0.0159           | 0.0159           | 0.3651           | 0.3413            | 0.7063           | 0.4921           | 1.0000           | 1.0000           | 0.9603           | 0.0556           | 0.0794            | 0.1905       | 0.4603       | 0.0397       | 0.0397       | 0.0079       | 0.1429         |
| IL-17                     | 0.8810           | 1.0000           | 0.8810           | 1.0000           | 1.0000           | 1.0000            | 0.7222           | 0.7222           | 0.8810           | 1.0000           | 0.7222           | 0.8810           | 0.7222            | 0.7222       | 0.8810       | 0.8810       | 0.7222       | 1.0000       | 1.0000         |
| IL-18                     | 1.0000           | 1.0000           | 1.0000           | 1.0000           | 1.0000           | 1.0000            | 1.0000           | 1.0000           | 1.0000           | 1.0000           | 1.0000           | 1.0000           | 1.0000            | 1.0000       | 1.0000       | 1.0000       | 1.0000       | 1.0000       | 1.0000         |
| IL-1b                     | 1.0000           | 0.2857           | 0.2857           | 1.0000           | 1.0000           | 1.0000            | 1.0000           | 0.4444           | 0.4444           | 1.0000           | 0.1667           | 1.0000           | 1.0000            | 1.0000       | 0.8810       | 0.1667       | 0.2857       | 0.2857       | 1.0000         |
| IL-1Ra                    | 0.9603           | 0.0952           | 0.0238           | 0.5635           | 1.0000           | 0.0714            | 0.5000           | 0.3413           | 0.2381           | 0.6111           | 0.0476           | 0.6032           | 0.6349            | 0.4048       | 0.8651       | 0.2143       | 0.1587       | 0.2063       | 0.3016         |
| IL-2                      | 0.6587           | 0.5794           | 0.5397           | 0.5397           | 0.9048           | 0.4683            | 0.6111           | 0.3492           | 0.1508           | 1.0000           | 0.2937           | 0.6746           | 0.7937            | 0.6984       | 0.4444       | 0.4683       | 0.7222       | 0.5794       | 0.7619         |
| IL-4                      | 1.0000           | 1.0000           | 0.7222           | 1.0000           | 1.0000           | 1.0000            | 0.4444           | 0.4444           | 0.1667           | 1.0000           | 0.0476           | 1.0000           | 1.0000            | 1.0000       | 0.2857       | 0.7222       | 0.2460       | 1.0000       | 1.0000         |
| IL-5                      | 1.0000           | 0.5635           | 0.6825           | 0.7222           | 0.4841           | 1.0000            | 0.2063           | 0.2063           | 0.0873           | 0.3254           | 0.0476           | 0.2063           | 0.6825            | 0.3651       | 0.3571       | 0.3571       | 0.1349       | 0.7460       | 0.1667         |
| IL-6                      | 0.0476           | 0.0079           | 0.0079           | 0.1667           | 1.0000           | 0.1667            | 0.4444           | 0.2857           | 0.0079           | 0.4444           | 0.6111           | 0.2857           | 0.2857            | 0.9286       | 0.9365       | 0.0238       | 0.2460       | 0.4444       | 1.0000         |
| IL-8 (CXCL8)              | 0.1270           | 0.0556           | 0.0397           | 0.0159           | 0.3175           | 0.9127            | 0.0079           | 0.0079           | 0.0079           | 0.0079           | 0.0079           | 0.0476           | 0.0794            | 0.0079       | 0.0556       | 0.2698       | 0.0238       | 0.0476       | 0.0714         |
| IP-10† (CXCL10)           | 0.0079           | 0.0159           | 0.0079           | 0.0238           | 0.0952           | 0.3968            | 0.0238           | 0.0079           | 0.0397           | 0.0079           | 0.6032           | 0.7460           | 0.1905            | 0.0079       | 0.0079       | 0.8571       | 0.0952       | 0.1587       | 0.0794         |
| MCP-1 (CCL2)              | 0.0079           | 0.0079           | 0.0079           | 0.0079           | 0.0952           | 1.0000            | 0.4127           | 0.0317           | 0.0079           | 0.2778           | 0.1190           | 0.4127           | 0.6190            | 0.1905       | 0.7063       | 0.0556       | 0.0873       | 0.3016       | 0.7143         |
| MIP-1a (CCL3)             | 1.0000           | 0.8095           | 0.7222           | 0.8413           | 0.9048           | 0.5952            | 0.2540           | 0.8651           | 0.1429           | 0.5238           | 0.0238           | 0.0635           | 0.7381            | 1.0000       | 0.0794       | 0.7778       | 0.0079       | 0.4048       | 0.4048         |
| MIP-1b (CCL4)             | 0.4841           | 0.3016           | 0.3175           | 0.9286           | 1.0000           | 0.4127            | 0.0714           | 0.2698           | 0.7143           | 0.0794           | 0.3333           | 0.0238           | 0.0079            | 0.0794       | 0.2619       | 0.1270       | 0.1111       | 0.0159       | 0.0397         |
| sCD40L                    | 1.0000           | 0.2698           | 0.1270           | 0.1746           | 0.2143           | 0.0714            | 0.2857           | 0.7063           | 0.2937           | 0.8651           | 0.0476           | 0.2857           | 0.9286            | 0.6746       | 0.7778       | 0.1270       | 0.3175       | 0.5476       | 0.8651         |
| TGFa                      | 0.4444           | 0.0714           | 0.0159           | 0.2381           | 0.2698           | 0.4841            | 0.3095           | 0.2698           | 0.0635           | 0.5238           | 0.0556           | 0.1429           | 1.0000            | 0.6667       | 0.3571       | 0.0635       | 0.1429       | 0.5159       | 0.6905         |
| TNFa                      | 0.8571           | 0.7460           | 0.6032           | 0.6032           | 1.0000           | 0.3730            | 1.0000           | 0.4524           | 0.5159           | 0.6587           | 0.3730           | 0.5238           | 0.3889            | 0.8810       | 0.7222       | 0.2778       | 0.4048       | 0.1111       | 1.0000         |
| VEGF                      | 0.6587           | 0.7143           | 0.6667           | 0.8333           | 0.8254           | 0.5556            | 0.0714           | 0.0794           | 0.0952           | 0.0317           | 0.0635           | 0.0476           | 0.0397            | 0.0556       | 0.0476       | 0.0238       | 0.0397       | 0.0476       | 0.0952         |

**Table S1 – Statistics for plasma soluble factor concentrations.** P-values after the permutation test for the indicated comparisons (all timepoints against baseline and homologous PP and PB timepoints against each other) are shown and colored in red when  $\leq 0.01$ . HOPP was chosen as the baseline for all soluble factors, except IP-10, as indicated with †, for which D-21PP was used as the baseline because macaque BD619 showed an aberrantly high level of IP-10 concentration at HOPP. nd, not determined. The areas under the curve (H3-D14 PP vs. H3-D14 PB) were computed giving the same weight to each timepoint, irrespective of the actual linear time scale (*e.g.* abundance at H3 has the same weight as abundance at D8) and compared using the permutation test. A permutation test, previously used to compare cytometry data<sup>22</sup>, was adapted to compare soluble factor levels, cell abundances, and the corresponding areas under the curve, because our dataset contained paired samples with n=5 and missing datapoints.

|               | HOPP vs H3PP | HOPP vs H6PP | HOPP vs D1PP | HOPP vs D3PP | HOPP vs D8PP | HOPP vs D14PP | HOPP vs H0PB | HOPP vs H3PB | HOPP vs H6PB | HOPP vs D1PB | HOPP vs D3PB | HOPP vs D8PB | HOPP vs D14PB | H3PP vs H3PB | H6PP vs H6PB | D1PP vs D1PB | D3PP vs D3PB | D8PP vs D8PB | D14PP vs D14PB |
|---------------|--------------|--------------|--------------|--------------|--------------|---------------|--------------|--------------|--------------|--------------|--------------|--------------|---------------|--------------|--------------|--------------|--------------|--------------|----------------|
| Leukocytes    | 0.0079       | 0.0079       | 0.0079       | 0.0238       | 0.0159       | 0.5317        | 0.2937       | 0.0079       | 0.0079       | 0.0079       | 0.0556       | 0.0893       | 0.3254        | 0.0794       | 0.4365       | 0.0556       | 0.8571       | 0.5143       | 0.6746         |
| Granulocytes  | 0.0079       | 0.0079       | 0.0079       | 0.0079       | 0.0079       | 0.8413        | 0.1190       | 0.0079       | 0.0079       | 0.0079       | 0.1111       | 0.1607       | 0.1349        | 0.0397       | 0.6508       | 0.0794       | 0.9048       | 0.5143       | 0.1429         |
| Monocytes-DCs | 0.3175       | 0.0238       | 0.0397       | 0.2540       | 0.4365       | 0.4286        | 0.5794       | 0.4444       | 0.0238       | 0.1508       | 0.2222       | 0.5536       | 0.7540        | 1.0000       | 0.5476       | 0.1349       | 0.7937       | 1.0000       | 0.4841         |

**Table S2 – Statistics for absolute blood leukocyte, granulocyte, and monocyte-DC counts.** P-values after the permutation test for the indicated comparisons

are shown and colored in red when  $\leq 0.01$ .

| Metal | Marker       | Clone     | Surface | Intra-cellular |
|-------|--------------|-----------|---------|----------------|
| 141Pr | CD66         | TET2      | ●       |                |
| 142Nd | HLA-DR       | L243      | ●       |                |
| 143Nd | CD3          | SP34.2    | ●       |                |
| 144Nd | CD64         | 10.1      | ●       |                |
| 145Nd | CD8          | RPAT8     | ●       |                |
| 146Nd | IL-6         | MQ2.13A5  |         | ●              |
| 147Sm | CD123        | 7G3       | ●       |                |
| 148Nd | IL-4         | 8D48      |         | ●              |
| 149Sm | CD11a        | HI111     | ●       |                |
| 150Nd | CD11b        | ICRF144   | ●       |                |
| 151Eu | IL-8         | G265.8    |         | ●              |
| 152Sm | CD4          | L200      | ●       |                |
| 153Eu | CD23         | 9P25      | ●       |                |
| 154Sm | CD86         | IT2.2     | ●       |                |
| 156Gd | MIP-1b       | D21-1351  |         | ●              |
| 158Gd | IP-10        | 6D4       |         | ●              |
| 159Tb | TNF $\alpha$ | MAb11     |         | ●              |
| 160Gd | IL-1a        | 364/3B3   |         | ●              |
| 161Dy | CD32         | FLI8.26   | ●       |                |
| 162Dy | IL-12        | C8.6      |         | ●              |
| 163Dy | MCP-1        | 2H5       |         | ●              |
| 164Dy | CXCR4        | 12G5      | ●       |                |
| 165Ho | IFN $\gamma$ | B27       |         | ●              |
| 166Er | CCR5         | 3A9       | ●       |                |
| 167Er | CD16         | 3G8       | ●       |                |
| 168Er | CD11c        | 3.9       | ●       |                |
| 169Tm | IFN $\alpha$ | LT27/295  |         | ●              |
| 170Er | CD14         | M5E2      | ●       |                |
| 171Yb | IL-10        | 127107    |         | ●              |
| 172Yb | CD45         | D058-1283 | ●       |                |
| 174Yb | CD20         | 2H7       | ●       |                |
| 175Lu | CCR7         | G043H7    | ●       |                |

**Table S3 – Mass cytometry antibody panel.** The associated clone and metal are indicated for each marker. The right columns indicate whether the markers were extra- or intra-cellularly stained. <sup>∞</sup>The TET2 antibody clone recognizes four members of the CD66 family: CD66a (CEACAM1), CD66b (CEACAM8), CD66c (CEACAM6), and CD66e (CEACAM5). <sup>§</sup>The FLI8.26 antibody clone reacts with CD32a and CD32b. <sup>‡</sup>The LT27/295 antibody clone stains most IFN $\alpha$  subtypes, but not IFN $\alpha$  2b.

|                     | HOPP vs H3PP | HOPP vs H6PP | HOPP vs D1PP | HOPP vs D3PP | HOPP vs D8PP | HOPP vs D14PP | HOPP vs H0PB | HOPP vs H3PB | HOPP vs H6PB | HOPP vs D1PB | HOPP vs D3PB | HOPP vs D8PB | HOPP vs D14PB | H3PP vs H3PB | H6PP vs H6PB | D1PP vs D1PB | D3PP vs D3PB | D8PP vs D8PB | D14PP vs D14PB |
|---------------------|--------------|--------------|--------------|--------------|--------------|---------------|--------------|--------------|--------------|--------------|--------------|--------------|---------------|--------------|--------------|--------------|--------------|--------------|----------------|
| Kinetic Family I    | 0.0079       | 0.0238       | 0.1667       | 1.0000       | 0.5635       | 0.9524        | 0.0079       | 0.0476       | 0.7222       | 0.0079       | 0.0079       | 0.3750       | 0.0079        | 0.0079       | 0.0079       | 0.0079       | 0.0079       | 0.6286       | 0.0079         |
| Kinetic Family II   | 0.0079       | 0.0079       | 0.0794       | 0.1825       | 0.0079       | 0.2302        | 0.0079       | 0.0079       | 0.0079       | 0.0079       | 0.1190       | 0.5357       | 0.0079        | 0.0159       | 0.0079       | 0.0079       | 0.1429       | 0.0286       | 0.0079         |
| Kinetic Family III  | 0.0079       | 0.0079       | 0.0079       | 0.0079       | 0.1984       | 0.5556        | 0.0079       | 0.0079       | 0.1905       | 0.3492       | 0.0238       | 0.4464       | 0.0079        | 0.0079       | 0.0079       | 0.0079       | 0.0079       | 0.8000       | 0.0079         |
| Kinetic Family IV   | 0.5635       | 0.0238       | 0.0873       | 0.1825       | 0.0079       | 0.6825        | 0.0079       | 0.0079       | 0.0079       | 0.0079       | 0.0079       | 0.0179       | 0.0079        | 0.0079       | 0.0079       | 0.0079       | 0.0159       | 0.0857       | 0.0079         |
| Kinetic Family V    | 0.9524       | 0.3016       | 0.0079       | 0.0794       | 0.4921       | 0.5556        | 0.2619       | 0.4127       | 0.5397       | 0.0476       | 0.0794       | 0.0179       | 0.5714        | 0.6032       | 0.4206       | 1.0000       | 0.8413       | 0.0286       | 0.3730         |
| Kinetic Family VI   | 0.8810       | 0.3333       | 0.1190       | 0.3571       | 0.1667       | 0.8968        | 0.0079       | 0.0476       | 0.0079       | 0.0079       | 0.0079       | 0.0179       | 0.0079        | 0.0476       | 0.1190       | 0.0079       | 0.0317       | 0.0286       | 0.0079         |
| Kinetic Family VII  | 0.2460       | 0.0476       | 0.0556       | 0.9048       | 0.2381       | 1.0000        | 0.6190       | 0.3889       | 0.0952       | 0.5873       | 0.4444       | 0.1071       | 1.0000        | 0.9048       | 0.1984       | 0.0952       | 0.4286       | 0.8857       | 1.0000         |
| Kinetic Family VIII | 0.0079       | 0.0079       | 0.0079       | 0.0556       | 0.6190       | 0.0476        | 0.6508       | 0.1667       | 0.0079       | 0.0079       | 0.2778       | 0.3393       | 0.7937        | 0.1429       | 0.4921       | 0.0714       | 0.5556       | 0.8286       | 0.0317         |
| Kinetic Family IX   | 0.1587       | 0.0238       | 0.3968       | 0.7460       | 0.8254       | 1.0000        | 0.9206       | 0.8571       | 0.0317       | 0.4127       | 0.6667       | 0.2321       | 0.4603        | 0.0317       | 0.6667       | 0.0317       | 0.4603       | 0.0571       | 0.3254         |
| Kinetic Family X    | 1.0000       | 0.1270       | 0.3016       | 0.2063       | 0.0159       | 0.8254        | 0.0476       | 0.0159       | 0.0317       | 0.0079       | 0.0079       | 0.7857       | 0.0476        | 0.0159       | 0.1984       | 0.1667       | 0.0556       | 0.0857       | 0.2063         |
| Kinetic Family XI   | 0.3651       | 0.4603       | 0.6111       | 0.2302       | 0.5397       | 0.4683        | 0.3492       | 0.2857       | 1.0000       | 0.5000       | 0.8651       | 0.4643       | 0.4444        | 0.9206       | 0.4048       | 0.3333       | 0.1429       | 0.7714       | 0.0794         |
| Kinetic Family XII  | 0.0159       | 0.0317       | 0.8413       | 0.7222       | 0.6905       | 0.8175        | 0.9603       | 0.6429       | 0.3571       | 0.2143       | 1.0000       | 0.8929       | 0.6190        | 0.0079       | 0.0952       | 0.2222       | 1.0000       | 0.5143       | 0.7540         |

**Table S4 – Statistics for kinetic family abundance.** P-values after the permutation test for the indicated comparisons are shown and colored in red when  $\leq 0.01$ .



|              | BB078            | BB231            | BC641            | BD619            | BD620            | ALL               |
|--------------|------------------|------------------|------------------|------------------|------------------|-------------------|
| D-19PP       | 114 244          | 117 463          | 147 515          | 160 415          | 137 862          | 677 499           |
| D0PP         | 105 318          | 62 451           | 71 336           | 131 117          | 161 546          | 531 768           |
| H3PP         | 158 371          | 159 250          | 190 509          | 133 164          | 194 991          | 836 285           |
| H6PP         | 154 642          | 197 605          | 192 414          | 186 113          | 150 724          | 881 498           |
| D1PP         | 146 185          | 87 666           | 153 658          | 151 935          | 185 683          | 725 127           |
| D3PP         | 115 397          | 93 663           |                  | 134 085          | 132 034          | 475 179           |
| D8PP         | 133 512          | 124 869          |                  | 121 685          | 97 003           | 477 069           |
| D14PP        | 157 067          | 146 843          | 144 849          | 116 936          | 144 753          | 710 448           |
| D0PB         | 173 286          | 200 907          | 68 326           | 147 323          | 139 075          | 728 917           |
| H3PB         | 214 595          | 164 924          | 68 369           | 64 272           | 113 498          | 625 658           |
| H6PB         | 225 773          | 244 110          | 270 132          | 233 035          | 233 264          | 1 206 314         |
| D1PB         | 193 136          | 128 369          | 234 244          | 159 883          | 175 616          | 891 248           |
| D3PB         | 108 404          | 189 688          | 95 487           | 103 584          | 164 337          | 661 500           |
| D8PB         | 226 125          |                  | 239 341          | 233 747          | 318 350          | 1 017 563         |
| D14PB        | 225 733          | 230 585          | 140 196          | 150 390          | 295 739          | 1 042 643         |
| <b>TOTAL</b> | <b>2 451 788</b> | <b>2 148 393</b> | <b>2 016 376</b> | <b>2 227 684</b> | <b>2 644 475</b> | <b>11 488 716</b> |

**Table S5 – Numbers of cells acquired for each sample.** The number of cells of interest acquired with the CyTOF device (live non CD3<sup>+</sup>CD66<sup>+</sup> singlets) is displayed for each animal and each timepoint. Baseline samples were collected 19 days before the prime (D-19) or just before the prime (H0PP). Samples were also collected just before the boost, 58 days after the prime (H0PB). The sums of all cells acquired for each animal and each timepoint are indicated at the bottom and on the right, respectively. Missing samples are indicated in gray. The smallest sample (macaque BB231 at D0PP) contained 62,451 cells, whereas the largest sample (macaque BD620 at D8PB) contained 318,350 cells. Samples from macaque BC641 at D3PP and D8PP and macaque BB231 at D8PB were excluded from the SPADE analysis due to the low number of acquired cells of interest (<50,000 live non CD3<sup>+</sup> CD66<sup>+</sup> singlets). The SPADE analysis was performed on 72 samples for a total of 11,488,716 cells (**Supplementary Table S5**). We avoided a bias in the analysis toward samples with significantly more cells than others by performing random pre-downsampling by selecting the same number of cells (60,000) in each sample. All cells were finally up-sampled in the last SPADE step.

| Markers | Number of non-uniform clusters | Percentage of non-uniform clusters |
|---------|--------------------------------|------------------------------------|
| CD64    | 150                            | 25                                 |
| CD45    | 36                             | 6                                  |
| CD32    | 30                             | 5                                  |
| CD11a   | 13                             | 2.17                               |
| CD4     | 8                              | 1.33                               |
| CD8     | 8                              | 1.33                               |
| CD11b   | 7                              | 1.17                               |
| CD11c   | 4                              | 0.67                               |
| CD123   | 4                              | 0.67                               |
| CD20    | 4                              | 0.67                               |
| CD66    | 4                              | 0.67                               |
| CD3     | 3                              | 0.50                               |
| CXCR4   | 3                              | 0.50                               |
| CD16    | 2                              | 0.33                               |
| HLA-DR  | 2                              | 0.33                               |
| CCR5    | 1                              | 0.17                               |
| CD14    | 1                              | 0.17                               |
| CCR7    | 0                              | 0                                  |
| CD23    | 0                              | 0                                  |
| CD86    | 0                              | 0                                  |

**Table S6 – Cluster uniformity per marker.** The number and corresponding percentage of ‘non-uniform’ clusters are shown for each marker. Non-uniform clusters were defined as clusters with non-unimodal or non-narrow expression for the indicated marker (non-unimodality being defined with the Hartigan’s dip test using a p-value threshold of 0.05 and non-narrow expression by an IQR  $\geq$  2). 62.5% of the clusters (375 of 600) showed a good SPADE clustering. Imperfect clustering quality was mainly related to the bimodal distribution of CD64 in 25% of the clusters (**Supplementary Figure S2** and **Table S6**). Except for CD64, 97% of the clusters were uniform for the expression of at least 18 of the 19 remaining clustering markers (**Supplementary Figure S2**).
